# Supplementary material
Source: Springer Nature journal article supplement (https://www.springermedizin.de/resource/supplementary/12891_2011_1571_MOESM2_ESM.pdf/9508122)

**(a)** mRNA expression of ROR- $\gamma$

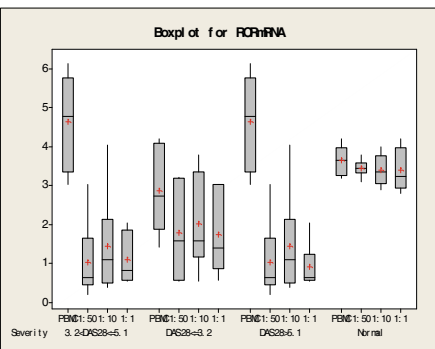

**(b)**

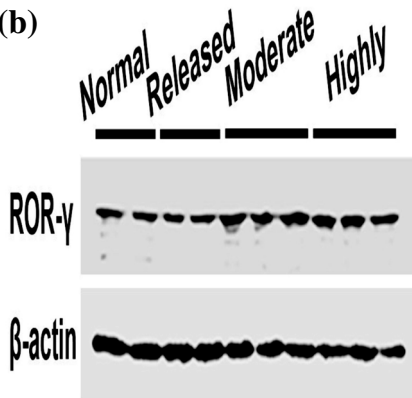

**(c)**

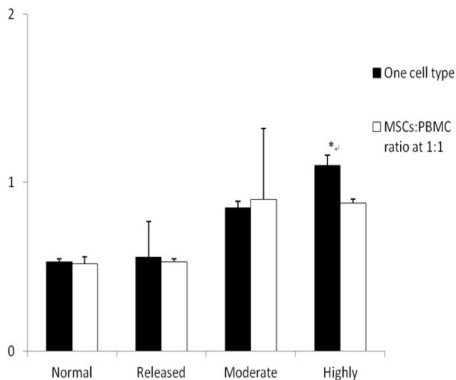

Supplement: MOESM2 [file 9508122]
